# Supplementary material
Source: Springer Nature journal article supplement (https://www.springermedizin.de/resource/supplementary/12936_2008_633_MOESM3_ESM.pdf/9547870)

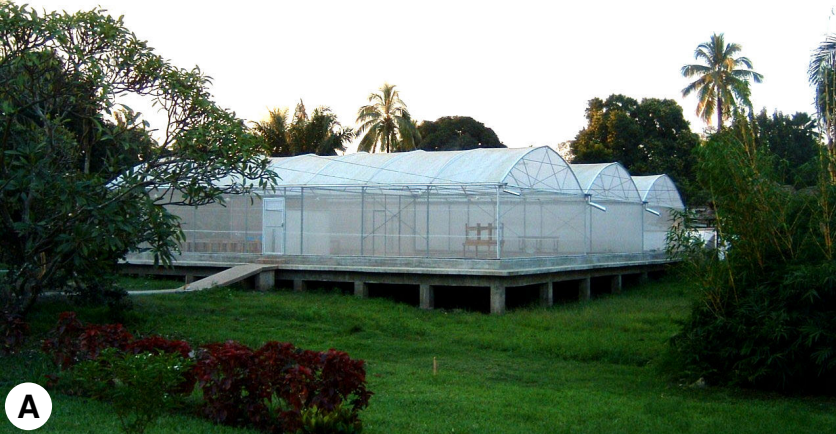

**A**

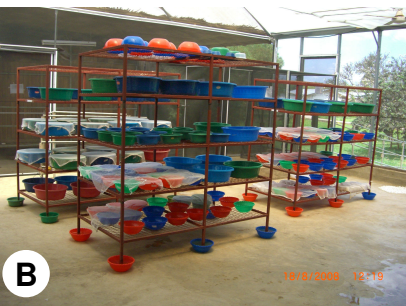

**B**

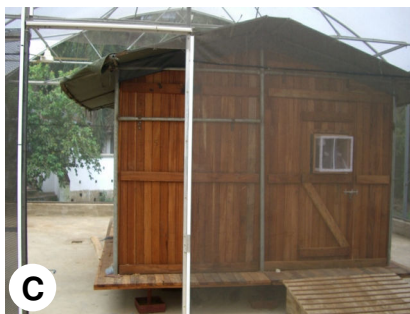

**C**

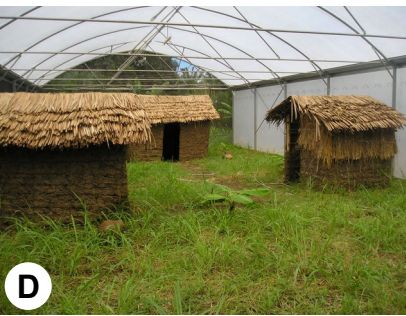

**D**

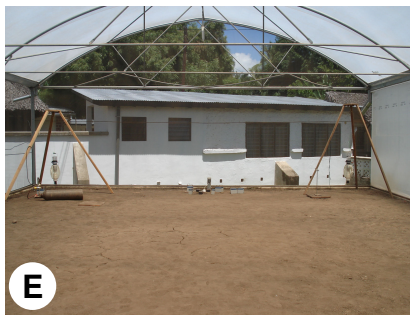

**E**

Supplement: MOESM3 [file 9547870]
